# Supplementary figures and images for: Hypoxic Roadmap of Glioblastoma—Learning about Directions and Distances in the Brain Tumor Environment
Source: MDPI journal article supplement (doi:10.3390/cancers12051213), 2020-05-13

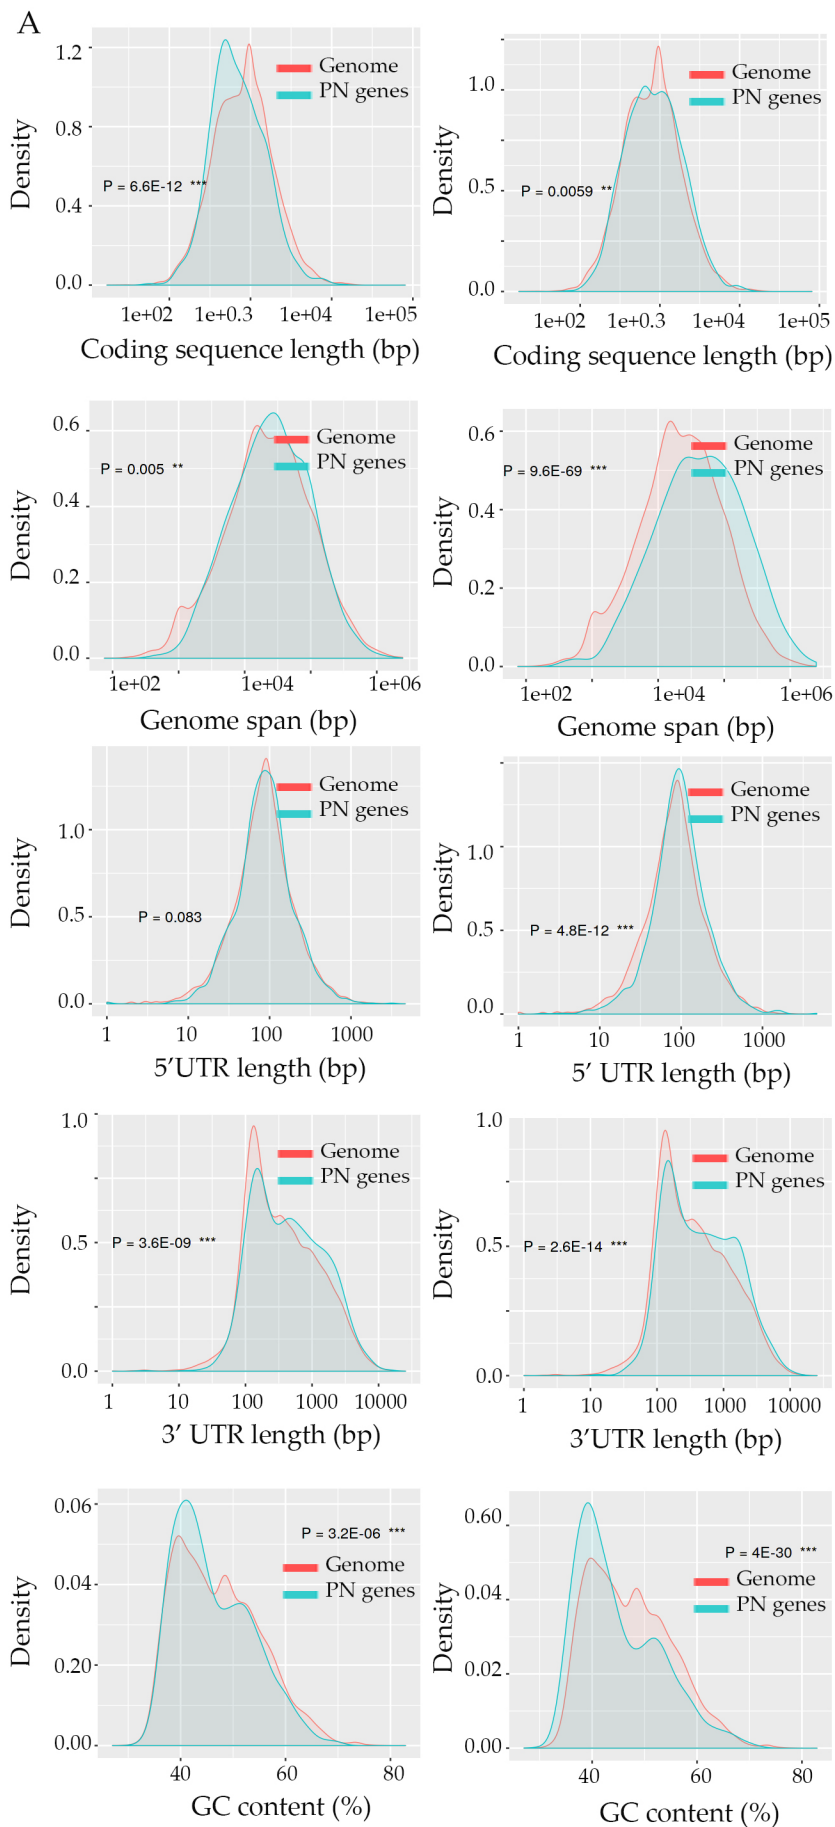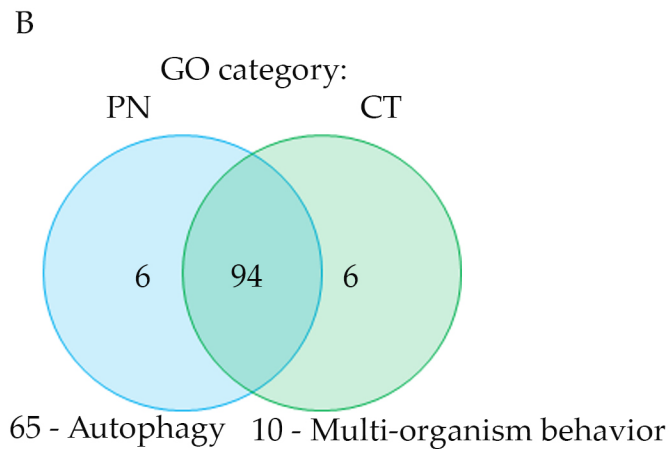

Supplement: s1 [file s1]

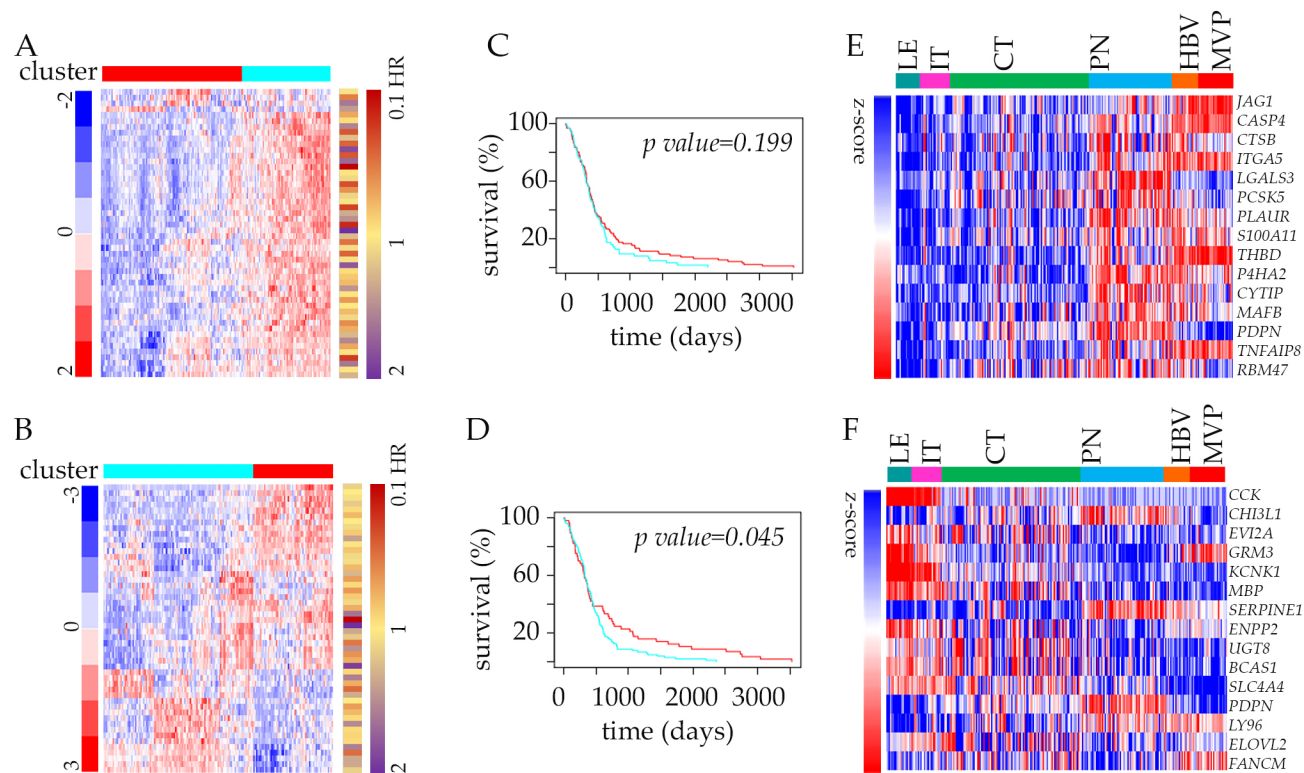

Supplement: s1 [file s1]

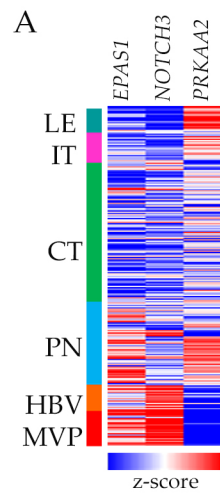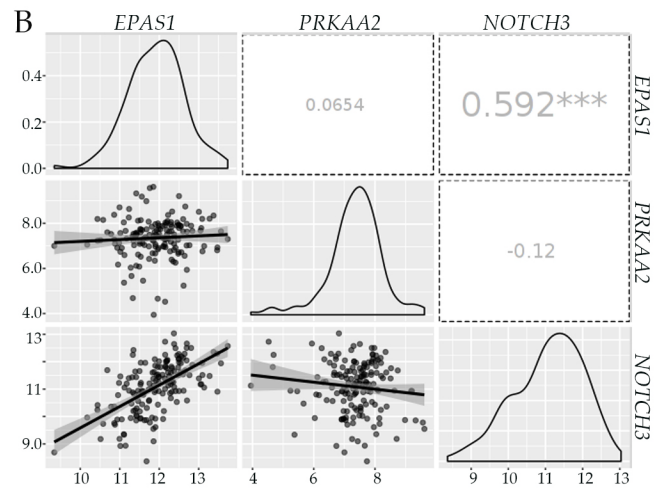

Supplement: s1 [file s1]

A

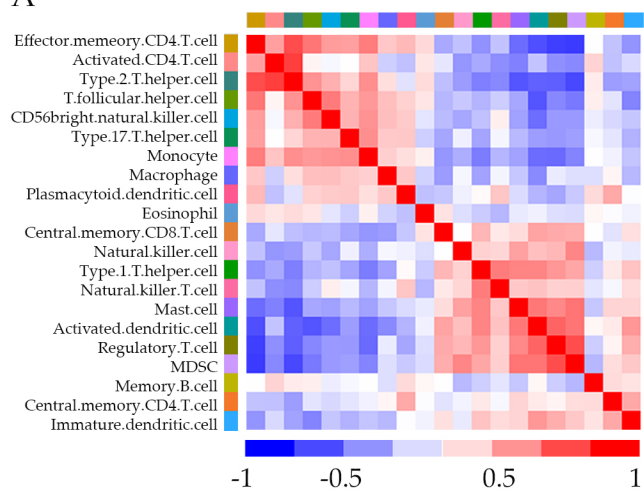

B

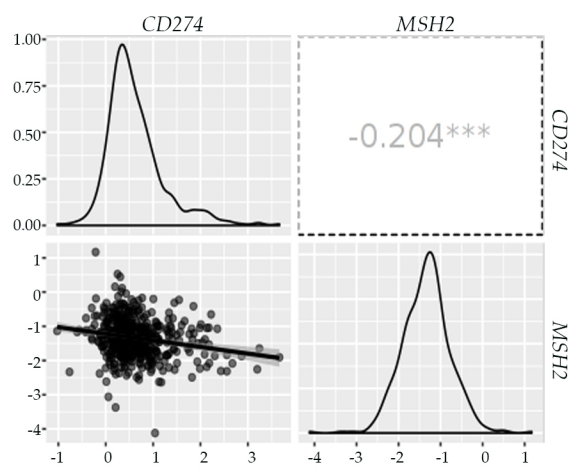

C

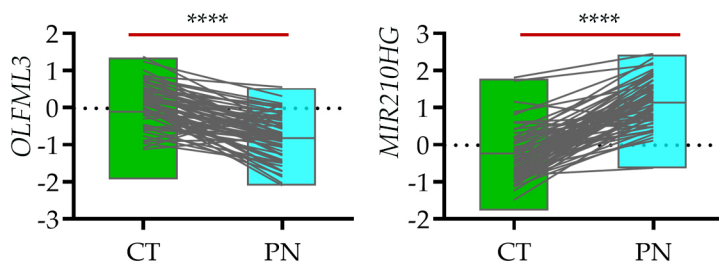

Supplement: s1 [file s1]
